# Supplementary material for: Boosting the photocatalytic hydrogen evolution performance of monolayer C2N coupled with MoSi2N4: density-functional theory calculations
Source: Royal Society of Chemistry journal article supplement (doi:10.1039/d1cp00364j), 2021-01-01
Supplement: d1cp00364j1.pdf [file d1cp00364j1.pdf]

# **Boosting the photocatalytic hydrogen evolution performance of C<sub>2</sub>N monolayer coupled with MoSi<sub>2</sub>N<sub>4</sub>: density-functional theory calculations**

Jian Zeng,<sup>a</sup> Liang Xu,<sup>abe\*</sup> Youwen Yang,<sup>a\*</sup> Xin Luo,<sup>ce</sup> Hong-Ju Li,<sup>de</sup> S.X. Xiong<sup>b</sup> and Ling-Ling Wang<sup>e</sup>

<sup>a</sup> Energy Materials Computing Center, School of Energy and Mechanical Engineering, Jiangxi University of Science and Technology, Nanchang 330013, China

<sup>b</sup> Jiangxi Provincial Key Laboratory for Simulation and Modelling of Particulate Systems, Jiangxi University of Science and Technology, Nanchang 330013, China

<sup>c</sup> Department of Applied Physics, School of Science, East China Jiaotong University, Nanchang 330013, China

<sup>d</sup> School of Electronic Science and Applied Physics, Hefei University of Technology, Hefei 230009, China

<sup>e</sup> Key Laboratory for Micro-Nano Optoelectronic Devices of Ministry of Education, School of Physics and Electronics, Hunan University, Changsha 410082, China

---

\*Corresponding author: [liangxu@hnu.edu.cn](mailto:liangxu@hnu.edu.cn); [yangyouweng@csu.edu.cn](mailto:yangyouweng@csu.edu.cn)

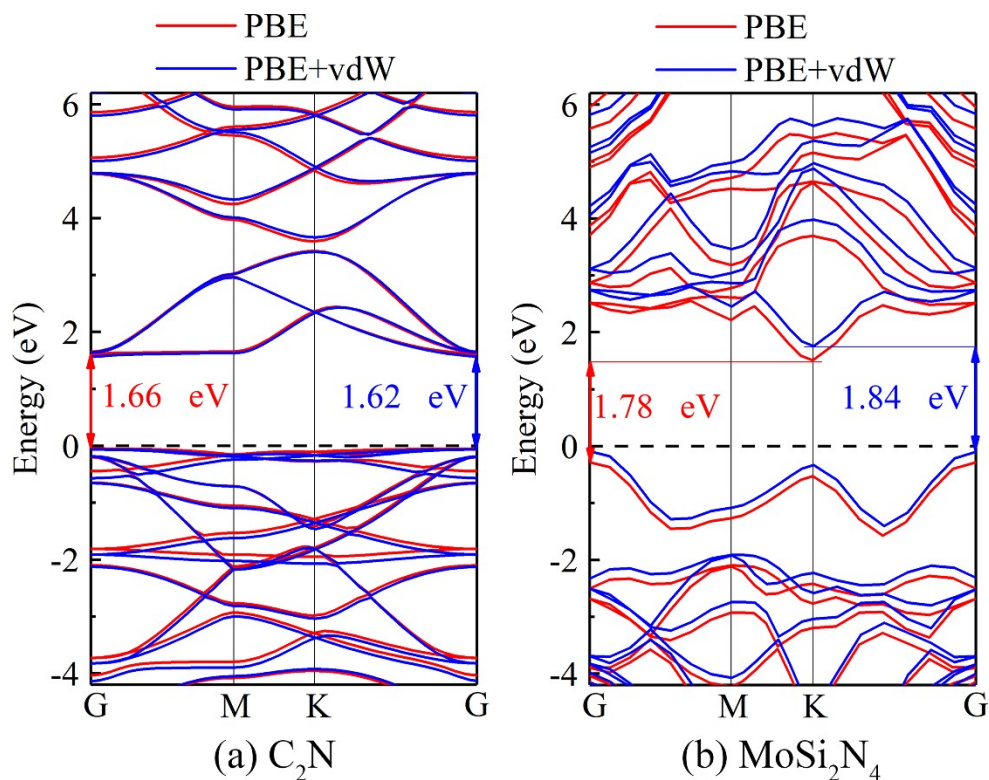

**Figure S1.** Calculated band structures of (a)  $C_2N$  and (b)  $MoSi_2N_4$  monolayers with PBE method. The red and blue lines represent the results with and without vdW correction, respectively.

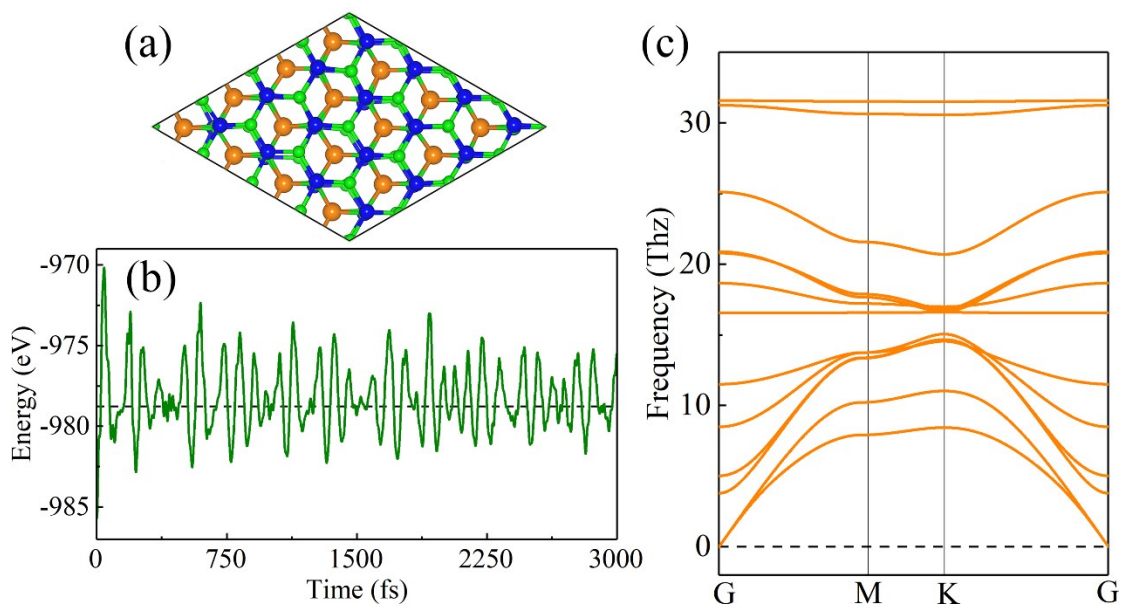

**Figure S2.** (a) Top view of the snapshot from the molecular dynamics simulation of atomic structures for  $4 \times 4$   $MoSi_2N_4$  at 300 K. (b) Variation of the total potential energy in the molecular dynamics simulation at room temperature during the time scale of 3.0 ps. (c) The calculated phonon dispersion spectra of  $MoSi_2N_4$ .

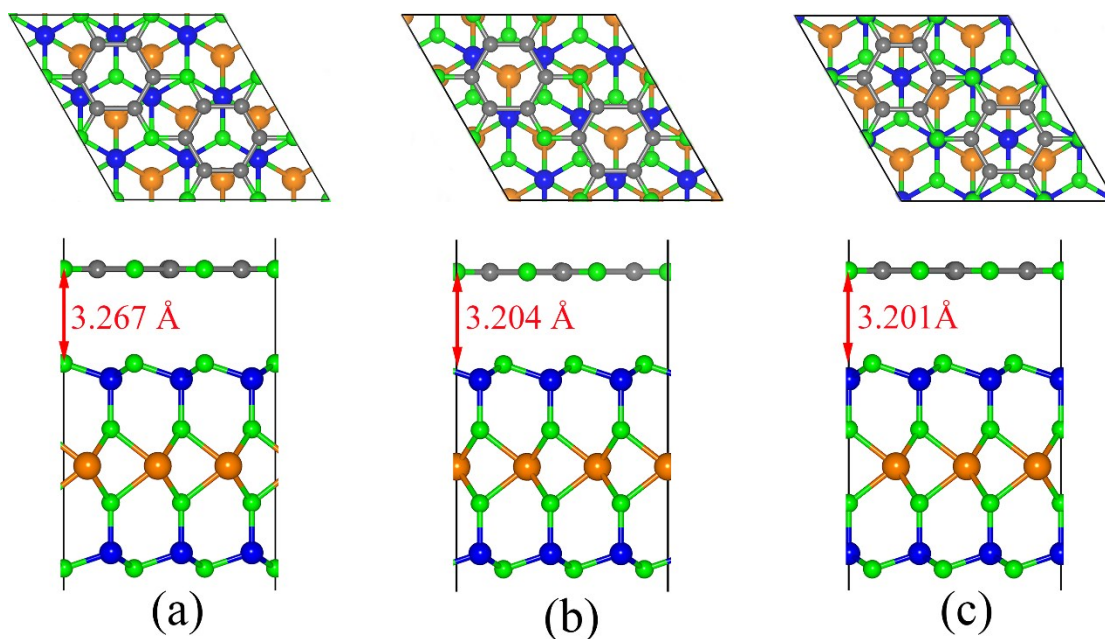

**Figure S3.** Three different stacking patterns for  $C_2N/MoSi_2N_4$  heterojunctions with high symmetry, including top and side views.

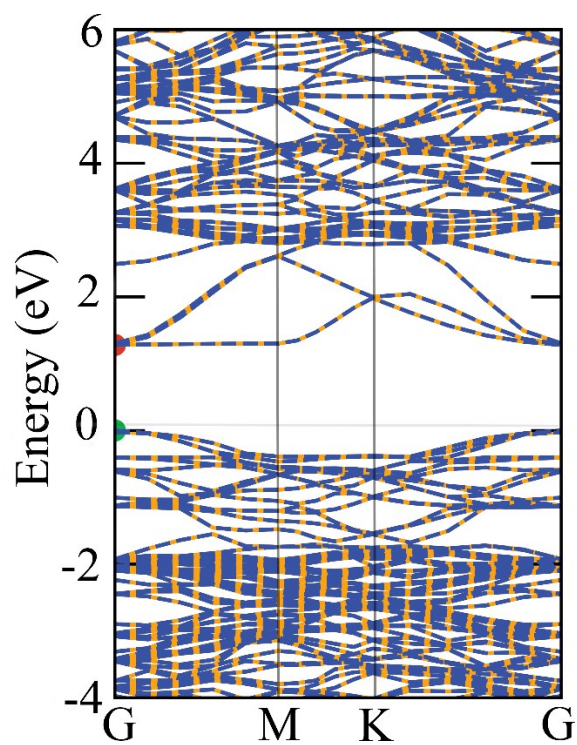

**Figure S4.** Spin polarized band of  $C_2N/MoSi_2N_4$  heterojunction using PBE calculation.
